# Supplementary material
Source: PubMed Central journal article supplement (PMC5769450)
Supplement: NIHMS932467-supplement-supplement_1.pdf [file NIHMS932467-supplement-supplement_1.pdf]

# Time to Retreatment and Survival in CLL/SLL

**Supplemental Figure 1** Surveillance, Epidemiology, and End Results—Medicare Cohort: Estimated 5-year Relative Survival From the Initiation of Second-line Treatment, Stratified by Number of Treatment Cycles Received During First-line Treatment and the Time Interval Between First- and Second-line Treatments

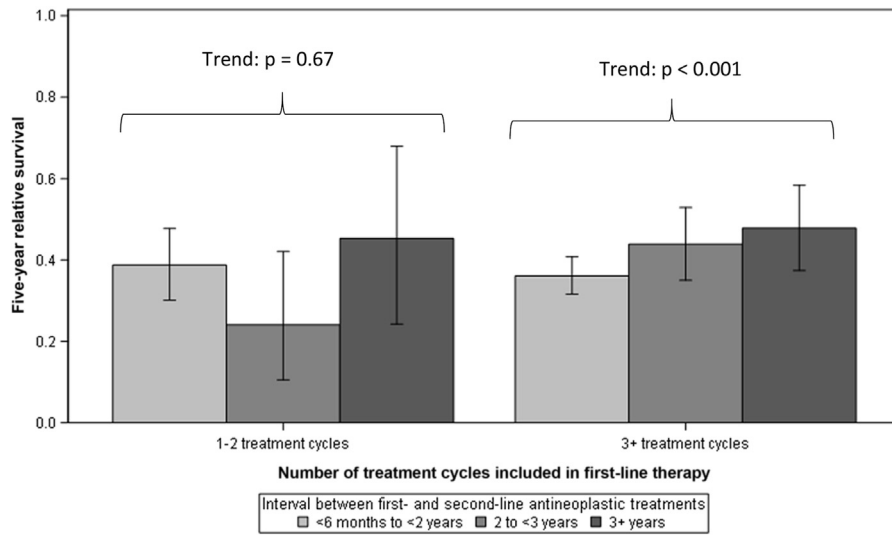

**Supplemental Figure 2** Surveillance, Epidemiology, and End Results—Medicare Cohort: Estimated 5-year Relative Survival From the Initiation of Second-line Treatment, Stratified by Patient Age and Time Interval Between First- and Second-line Treatments

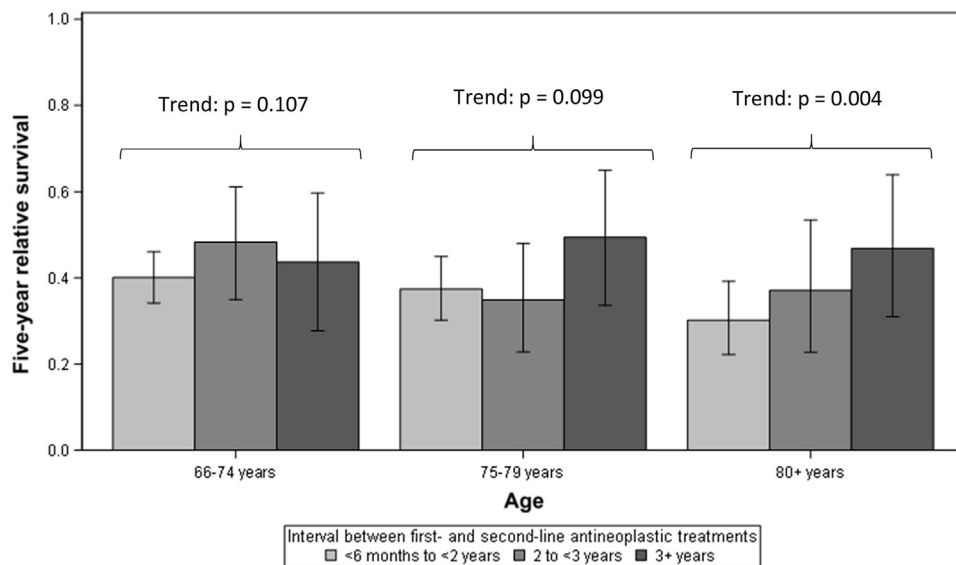

**Supplemental Figure 3** Surveillance, Epidemiology, and End Results—Medicare Cohort: Estimated 5-year Relative Survival From the Initiation of Second-line Treatment, Stratified by Major Comorbidity Count and Time Interval Between First- and Second-line Treatments

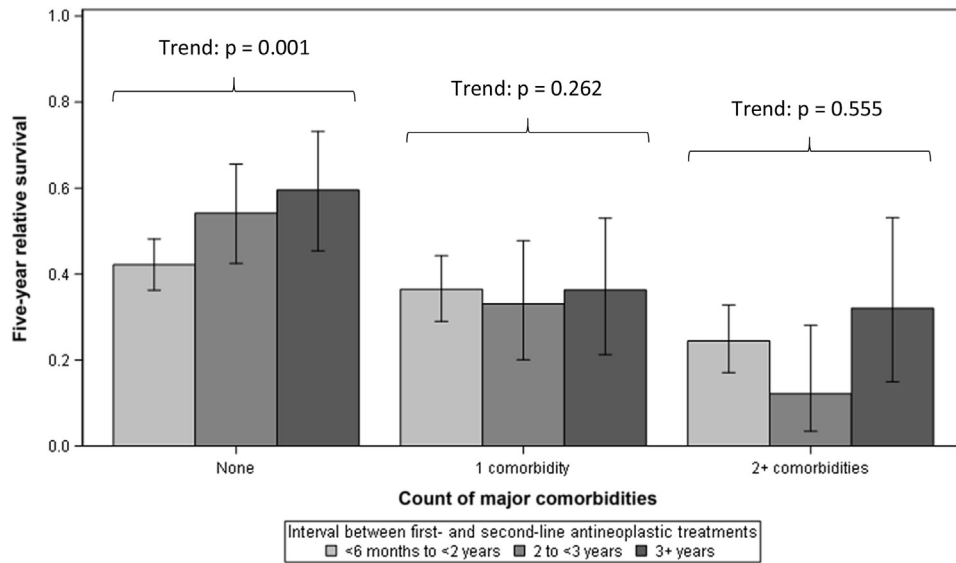

# Time to Retreatment and Survival in CLL/SLL

**Supplemental Table 1** Administrative Diagnosis and Procedure Codes Used to Identify Receipt of Chemotherapy and Immunotherapy

| Definition                | Code Type        | Code  | Valid Interval Start Date | Valid Interval End Date |
|---------------------------|------------------|-------|---------------------------|-------------------------|
| Alemtuzumab               | CPT/HCPCS        | J9010 | 01/01/2003                | —                       |
| Bendamustine              | CPT/HCPCS        | J9033 | 01/01/2009                | —                       |
| Chemotherapy              | DRG              | 410   | —                         | —                       |
| Chemotherapy              | CITD-9 DIAGNOSIS | V5811 | —                         | —                       |
| Immunotherapy             | CITD-9 DIAGNOSIS | V5812 | —                         | —                       |
| Chemotherapy              | CITD-9 PROCEDURE | 9925  | —                         | —                       |
| Chemotherapy <sup>a</sup> | CPT/HCPCS        | 964xx | —                         | —                       |
| Chemotherapy              | CPT/HCPCS        | 9650x | —                         | —                       |
| Chemotherapy              | CPT/HCPCS        | 9651x | —                         | —                       |
| Chemotherapy              | CPT/HCPCS        | 9652x | —                         | —                       |
| Chemotherapy              | CPT/HCPCS        | 9653x | —                         | —                       |
| Chemotherapy              | CPT/HCPCS        | 9654x | —                         | —                       |
| Chemotherapy              | CPT/HCPCS        | G0355 | 01/01/2005                | 12/31/2005              |
| Chemotherapy              | CPT/HCPCS        | G0356 | 01/01/2005                | 12/31/2005              |
| Chemotherapy              | CPT/HCPCS        | G0357 | 01/01/2005                | 12/31/2005              |
| Chemotherapy              | CPT/HCPCS        | G0358 | 01/01/2005                | 12/31/2005              |
| Chemotherapy              | CPT/HCPCS        | G0359 | 01/01/2005                | 12/31/2005              |
| Chemotherapy              | CPT/HCPCS        | G0360 | 01/01/2005                | 12/31/2005              |
| Chemotherapy              | CPT/HCPCS        | G0361 | 01/01/2005                | 12/31/2005              |
| Chemotherapy              | CPT/HCPCS        | G0362 | 01/01/2005                | 12/31/2005              |
| Chemotherapy <sup>a</sup> | CPT/HCPCS        | J9xxx | —                         | —                       |
| Chemotherapy              | CPT/HCPCS        | Q0083 | —                         | —                       |
| Chemotherapy              | CPT/HCPCS        | Q0084 | —                         | —                       |
| Chemotherapy              | CPT/HCPCS        | Q0085 | —                         | —                       |
| Chemotherapy              | Revenue          | 0331  | —                         | —                       |
| Chemotherapy              | Revenue          | 0332  | —                         | —                       |
| Chemotherapy              | Revenue          | 0335  | —                         | —                       |
| Chlorambucil              | CPT/HCPCS        | S0172 | 01/01/2002                | —                       |
| Cladribine                | CPT/HCPCS        | J9065 | 01/01/1995                | —                       |
| Cyclophosphamide          | CPT/HCPCS        | J8530 | 01/01/1995                | —                       |
| Cyclophosphamide          | CPT/HCPCS        | J9070 | 01/01/1984                | —                       |
| Cyclophosphamide          | CPT/HCPCS        | J9080 | 01/01/1994                | 12/31/2010              |
| Cyclophosphamide          | CPT/HCPCS        | J9090 | 01/01/1994                | 12/31/2010              |
| Cyclophosphamide          | CPT/HCPCS        | J9091 | 01/01/1994                | 12/31/2010              |
| Cyclophosphamide          | CPT/HCPCS        | J9092 | 01/01/1994                | 12/31/2010              |
| Cyclophosphamide          | CPT/HCPCS        | J9093 | 01/01/1988                | 12/31/2010              |
| Cyclophosphamide          | CPT/HCPCS        | J9094 | 01/01/1994                | 12/31/2010              |
| Cyclophosphamide          | CPT/HCPCS        | J9095 | 01/01/1994                | 12/31/2010              |
| Cyclophosphamide          | CPT/HCPCS        | J9096 | 01/01/1994                | 12/31/2010              |
| Cyclophosphamide          | CPT/HCPCS        | J9097 | 01/01/1994                | 12/31/2010              |
| Doxorubicin               | CPT/HCPCS        | J9000 | 01/01/1984                | —                       |
| Doxorubicin               | CPT/HCPCS        | J9001 | 01/01/2000                | 12/31/2012              |
| Doxorubicin               | CPT/HCPCS        | J9002 | 01/01/2013                | 12/31/2013              |
| Doxorubicin               | CPT/HCPCS        | Q2048 | 07/01/2012                | 12/31/2012              |
| Doxorubicin               | CPT/HCPCS        | Q2049 | 07/01/2012                | —                       |
| Doxorubicin               | CPT/HCPCS        | Q2050 | 07/01/2013                | —                       |
| Fludarabine               | CPT/HCPCS        | C9262 | 04/01/2010                | 06/30/2010              |
| Fludarabine               | CPT/HCPCS        | J8562 | 01/01/2011                | —                       |
| Fludarabine               | CPT/HCPCS        | J9185 | 01/01/1994                | —                       |
| Fludarabine               | CPT/HCPCS        | Q2025 | 07/01/2010                | 12/31/2010              |
| Mitoxantrone              | CPT/HCPCS        | J9293 | 01/01/1990                | —                       |
| Obinutuzumab              | CPT/HCPCS        | J9301 | —                         | —                       |

**Supplemental Table 1** Continued

| Definition  | Code Type | Code  | Valid Interval Start Date | Valid Interval End Date |
|-------------|-----------|-------|---------------------------|-------------------------|
| Ofatumumab  | CPT/HCPCS | C9260 | 04/01/2010                | 12/31/2010              |
| Ofatumumab  | CPT/HCPCS | J9302 | 01/01/2011                | —                       |
| Pentostatin | CPT/HCPCS | J9268 | 01/01/1994                | —                       |
| Rituximab   | CPT/HCPCS | J9310 | 01/01/1999                | —                       |
| Vincristine | CPT/HCPCS | J9370 | 01/01/1986                | —                       |
| Vincristine | CPT/HCPCS | J9371 | 01/01/2014                | —                       |
| Vincristine | CPT/HCPCS | J9375 | 01/01/1988                | 12/31/2010              |
| Vincristine | CPT/HCPCS | J9380 | 01/01/1994                | 12/31/2010              |

In addition to the procedure and diagnosis codes listed above, National Drug Codes (NDCs) obtained from the 2015 Cerner Multum Lexicon were used to define receipt of the following drugs: alemtuzumab, bendamustine, chlorambucil, cladribine, cyclophosphamide, doxorubicin, fludarabine, ibritinib, idelalisib, lenalidomide, mitoxantrone, obinutuzumab, ofatumumab, pentostatin, rituximab, vincristine.

Abbreviations: CPT = Current Procedural Terminology; HCPCS = Healthcare Common Procedure Coding System.

<sup>a</sup>A subset of codes in the CPT/HCPCS ranges 964xx and J9xxx were excluded as being unlikely to represent antineoplastic therapy for chronic lymphocytic leukemia/small lymphocytic lymphoma. These codes are listed in [Supplemental Table 2](#) (in the online version).

**Supplemental Table 2** Specific Chemotherapy, Immunotherapy and Related Billing Codes Excluded as Unlikely to Represent Treatment for Chronic Lymphocytic Leukemia/Small Lymphocytic Lymphoma

| Definition                                                             | Code Type | Code  | Percentage of all Chemo-related Codes Observed in Cohort |
|------------------------------------------------------------------------|-----------|-------|----------------------------------------------------------|
| Aldesleukin injection                                                  | CPT/HCPCS | J9015 | 0.00                                                     |
| Arsenic trioxide injection                                             | CPT/HCPCS | J9017 | 0.02                                                     |
| Asparaginase, nos                                                      | CPT/HCPCS | J9020 | 0.00                                                     |
| Azacitidine injection                                                  | CPT/HCPCS | J9025 | 0.21                                                     |
| Bcg live intravesical vac                                              | CPT/HCPCS | J9031 | 0.10                                                     |
| Bevacizumab injection                                                  | CPT/HCPCS | J9035 | 0.32                                                     |
| Bleomycin sulfate injection                                            | CPT/HCPCS | J9040 | 0.06                                                     |
| Carmustine injection                                                   | CPT/HCPCS | J9050 | 0.00                                                     |
| Cetuximab injection                                                    | CPT/HCPCS | J9055 | 0.04                                                     |
| CHEMO HORMON ANTINEOPL SQ/IM                                           | CPT/HCPCS | 96402 | 0.19                                                     |
| Chemotherapy (in SEER-Medicare chemo range but definition unavailable) | CPT/HCPCS | J9240 | 0.00                                                     |
| Chemotherapy (in SEER-Medicare chemo range but definition unavailable) | CPT/HCPCS | J9295 | 0.00                                                     |
| Chemotherapy (in SEER-Medicare chemo range but definition unavailable) | CPT/HCPCS | J9376 | 0.00                                                     |
| Chemotherapy (in SEER-Medicare chemo range but definition unavailable) | CPT/HCPCS | J9381 | 0.00                                                     |
| CHEMOTHERAPY INTO CNS                                                  | CPT/HCPCS | 96450 | 0.04                                                     |
| Clofarabine injection                                                  | CPT/HCPCS | J9027 | 0.00                                                     |
| DACARBAZINE 100 MG                                                     | CPT/HCPCS | J9130 | 0.03                                                     |
| Dacarbazine 200 mg inj                                                 | CPT/HCPCS | J9140 | 0.02                                                     |
| Dactinomycin injection                                                 | CPT/HCPCS | J9120 | 0.00                                                     |
| Daunorubicin injection                                                 | CPT/HCPCS | J9150 | 0.00                                                     |
| Degarelix injection                                                    | CPT/HCPCS | J9155 | 0.00                                                     |
| Denileukin diftitox inj                                                | CPT/HCPCS | J9160 | 0.00                                                     |
| Diethylstilbestrol injection                                           | CPT/HCPCS | J9165 | 0.00                                                     |
| Docetaxel injection                                                    | CPT/HCPCS | J9171 | 0.03                                                     |
| Docetaxel injection                                                    | CPT/HCPCS | J9170 | 0.05                                                     |
| Elliotts b solution per mL                                             | CPT/HCPCS | J9175 | 0.00                                                     |
| Epirubicin hydrochloride, 50 mg                                        | CPT/HCPCS | J9180 | 0.00                                                     |

# Time to Retreatment and Survival in CLL/SLL

**Supplemental Table 2** Continued

| Definition                      | Code Type | Code   | Percentage of all Chemo-related Codes Observed in Cohort |
|---------------------------------|-----------|--------|----------------------------------------------------------|
| Floxuridine injection           | CPT/HCPCS | J9200  | 0.00                                                     |
| Fluorouracil injection          | CPT/HCPCS | J9190  | 0.23                                                     |
| Gemcitabine hcl injection       | CPT/HCPCS | J9201  | 0.19                                                     |
| Gemtuzumab ozogamicin inj       | CPT/HCPCS | J9300  | 0.00                                                     |
| Goserelin acetate implant       | CPT/HCPCS | J9202  | 0.10                                                     |
| HISTRELIN IMPLANT VANTAS 50 MG  | CPT/HCPCS | J9225  | 0.00                                                     |
| Inj melphalan hcl 50 mg         | CPT/HCPCS | J9245  | 0.00                                                     |
| INJ PEGASPARGASE SINGLE DOSE V  | CPT/HCPCS | J9266  | 0.00                                                     |
| Inj, epirubicin hcl, 2 mg       | CPT/HCPCS | J9178  | 0.00                                                     |
| INJECTION IDARUBICITIN HCL 5 MG | CPT/HCPCS | J9211  | 0.00                                                     |
| INJECTION IRINOTECAN 20 MG      | CPT/HCPCS | J9206  | 0.03                                                     |
| INJECTION MESNA 200 MG          | CPT/HCPCS | J9209  | 0.04                                                     |
| INJECTION MITOMYCIN 5 MG        | CPT/HCPCS | J9280  | 0.02                                                     |
| INJECTION OXALIPLATIN 0.5 MG    | CPT/HCPCS | J9263  | 0.05                                                     |
| INJECTION PACLITAXEL 30 MG      | CPT/HCPCS | J9265  | 0.19                                                     |
| INJECTION TOPOTECAN 4 MG        | CPT/HCPCS | J9350  | 0.01                                                     |
| INJECTION VINBLASTINE SULFATE   | CPT/HCPCS | J9360  | 0.07                                                     |
| Injection, fulvestrant          | CPT/HCPCS | J9395  | 0.00                                                     |
| Interferon alfa-2a inj          | CPT/HCPCS | J9213  | 0.05                                                     |
| Interferon alfa-2b inj          | CPT/HCPCS | J9214  | 0.17                                                     |
| Interferon alfacon-1 inj        | CPT/HCPCS | J9212  | 0.02                                                     |
| Ipilimumab injection            | CPT/HCPCS | J9228  | 0.00                                                     |
| IRRIG DRUG DELIVERY DEVCITE     | CPT/HCPCS | 96,523 | 1.29                                                     |
| LEUPROLIDE ACETATE 7.5 MG       | CPT/HCPCS | J9217  | 0.21                                                     |
| Leuprolide acetate implant      | CPT/HCPCS | J9219  | 0.00                                                     |
| Leuprolide acetate injection    | CPT/HCPCS | J9218  | 0.00                                                     |
| Mechlorethamine hcl inj         | CPT/HCPCS | J9230  | 0.00                                                     |
| MITOMYCIN 20 MG                 | CPT/HCPCS | J9290  | 0.00                                                     |
| Mitomycin 40 mg inj             | CPT/HCPCS | J9291  | 0.01                                                     |
| Paclitaxel protein bound        | CPT/HCPCS | J9264  | 0.02                                                     |
| Panitumumab injection           | CPT/HCPCS | J9303  | 0.00                                                     |
| Pemetrexed injection            | CPT/HCPCS | J9305  | 0.03                                                     |
| Plicamycin (mithramycin) inj    | CPT/HCPCS | J9270  | 0.00                                                     |
| REFILL/MAINT PORTABLE PUMP      | CPT/HCPCS | 96,521 | 0.07                                                     |
| REFILL/MAINT PUMP/RESVR SYST    | CPT/HCPCS | 96,522 | 0.07                                                     |
| Romidepsin injection            | CPT/HCPCS | J9315  | 0.00                                                     |
| Streptozocin injection          | CPT/HCPCS | J9320  | 0.00                                                     |
| Temsirolimus injection          | CPT/HCPCS | J9330  | 0.01                                                     |
| Thiotepa injection              | CPT/HCPCS | J9340  | 0.00                                                     |
| Topotecan injection             | CPT/HCPCS | J9351  | 0.00                                                     |
| Trastuzumab injection           | CPT/HCPCS | J9355  | 0.03                                                     |
| Valrubicin injection            | CPT/HCPCS | J9357  | 0.00                                                     |
| Vinorelbine tartrate inj        | CPT/HCPCS | J9390  | 0.02                                                     |

Abbreviations: bcg = Bacillus Calmette-Guérin; CNS = central nervous system; CPT = Current Procedural Terminology; hcl = hydrochloride; HCPCS = Healthcare Common Procedure Coding System; inj = injection/injectable; MAINT PUMP/RESVR SYST = maintenance pump/reservoir system; SEER = Surveillance, Epidemiology, and End Results; vac = vaccine.

**Supplemental Table 3** Categorization of Patients' First-Line Treatment Regimens

| Type of Antineoplastic Treatment Regimen | Specific Regimen as Determined From Drug-specific HCPCS and NDC Codes                                                                      | Frequency | Percent |
|------------------------------------------|--------------------------------------------------------------------------------------------------------------------------------------------|-----------|---------|
| Chemo-immunotherapy (n = 693)            | Fludarabine, cyclophosphamide and immunotherapy                                                                                            | 179       | 9.07    |
|                                          | Fludarabine and immunotherapy                                                                                                              | 254       | 12.87   |
|                                          | (Pentostatin or cladribine) and immunotherapy                                                                                              | 21        | 1.06    |
|                                          | Bendamustine and immunotherapy                                                                                                             | 50        | 2.53    |
|                                          | Cyclophosphamide, vincristine, doxorubicin and immunotherapy                                                                               | 48        | 2.43    |
|                                          | Cyclophosphamide, vincristine and immunotherapy                                                                                            | 102       | 5.17    |
|                                          | None of the above. Immunotherapy and at least 1 of the following: chlorambucil, cyclophosphamide, vincristine, doxorubicin or mitoxantrone | 39        | 1.97    |
| Chemotherapy alone (n = 824)             | Fludarabine and cyclophosphamide                                                                                                           | 64        | 3.24    |
|                                          | Fludarabine, pentostatin or cladribine <sup>a</sup>                                                                                        | 427       | 21.64   |
|                                          | Bendamustine                                                                                                                               | 16        | 0.81    |
|                                          | Cyclophosphamide, vincristine, and doxorubicin                                                                                             | 37        | 1.87    |
|                                          | Cyclophosphamide and vincristine                                                                                                           | 137       | 6.94    |
|                                          | None of the above. At least 1 of the following: chlorambucil, cyclophosphamide, vincristine, doxorubicin, or mitoxantrone                  | 143       | 7.25    |
| Immunotherapy alone (n = 457)            | Rituximab, ofatumumab, or alemtuzumab <sup>a</sup>                                                                                         | 457       | 23.15   |

Abbreviations: HCPCS = Healthcare Common Procedure Coding System; NDC = National Drug Code.

<sup>a</sup>Cells with fewer than 11 patients combined due to Surveillance, Epidemiology, and End Results—Medicare reporting requirements. Of the 427 patients who received fludarabine, pentostatin, or cladribine, fewer than 11 received pentostatin or cladribine. Of the 457 patients who received rituximab, ofatumumab or alemtuzumab, fewer than 11 patients received ofatumumab or alemtuzumab.
